# Supplementary material for: Solvent diffusion through a non-porous crystal ‘caught in the act’ and related single-crystal-to-single-crystal transformations in a cationic dinuclear Ag(i) complex
Source: Royal Society of Chemistry journal article supplement (doi:10.1039/c5ce01348h), 2015-01-01
Supplement: c5ce01348h1.pdf [file c5ce01348h1.pdf]

## Solvent diffusion through a non-porous crystal ‘caught in the act’ and related single-crystal-to-single-crystal transformations in a cationic dinuclear Ag(I) complex with 1,3-bis(imidazol-1-ylmethyl)-2,4,6-trimethylbenzene and $\text{BF}_4^-$ as counterion

Jo Alen, Luc Van Meervelt, Wim Dehaen and Liliana Dobrzańska

### Supplementary Data

Preparative and crystallographic details for  $[\text{Ag}_2(\text{bitmb})_2](\text{SbF}_6)_2$ : crystals of  $[\text{Ag}_2(\text{bitmb})_2](\text{SbF}_6)_2 \cdot 2\text{CH}_3\text{CN}$  (see L. Dobrzańska, *CrystEngComm*, 2011, **13**, 2303 – 2309) were heated for 40 minutes at 100°C, affording the solvent-free form.

**Table S1** Crystal data and details of the refinement parameters for the crystal structures of  $[\text{Ag}_2(\text{bitmb})_2](\text{SbF}_6)_2$

|                                               |                                                                         |
|-----------------------------------------------|-------------------------------------------------------------------------|
| Chemical formula                              | $\text{C}_{34}\text{H}_{40}\text{N}_8\text{Ag}_2 \cdot 2(\text{SbF}_6)$ |
| Formula Mass                                  | 1247.98                                                                 |
| Crystal system                                | Triclinic                                                               |
| $a/\text{Å}$                                  | 8.9070(4)                                                               |
| $b/\text{Å}$                                  | 9.6544(4)                                                               |
| $c/\text{Å}$                                  | 12.2203(5)                                                              |
| $\alpha/^\circ$                               | 92.845(2)                                                               |
| $\beta/^\circ$                                | 103.284(2)                                                              |
| $\gamma/^\circ$                               | 101.842(2)                                                              |
| Unit cell volume/ $\text{Å}^3$                | 995.78(7)                                                               |
| Temperature/K                                 | 100(2)                                                                  |
| Space group                                   | $P1$                                                                    |
| No. of formula units per unit cell, Z         | 1                                                                       |
| Radiation type                                | $\text{CuK}\alpha$                                                      |
| Absorption coefficient, $\mu/\text{mm}^{-1}$  | 19.266                                                                  |
| No. of reflections measured                   | 9080                                                                    |
| No. of independent reflections                | 3531                                                                    |
| $R_{int}$                                     | 0.0381                                                                  |
| Final $R_1$ values ( $I > 2\sigma(I)$ )       | 0.0388                                                                  |
| Final $wR_2(F^2)$ values ( $I > 2\sigma(I)$ ) | 0.0895                                                                  |
| Final $R_1$ values (all data)                 | 0.0471                                                                  |
| Final $wR_2(F^2)$ values (all data)           | 0.0931                                                                  |
| Goodness of fit on $F^2$                      | 1.061                                                                   |

$$^a R_1 = \sum \|F_o\| - \|F_c\| / \sum \|F_o\|.$$

$$^b wR_2 = \{\sum [w(F_o^2 - F_c^2)^2] / \sum [w(F_o^2)^2]\}^{1/2}.$$

**Table S2** Effect of the counterions on the shape of the formed metallocycles

| Compound                                                                | Counterion geometry | Counter ion Volume/<br>$\text{\AA}^3$ | Metal–metal distance in the metallocycle/<br>$\text{\AA}$ | Distance between the least-squares planes of mesitylene rings/centroid–centroid distance between these rings in the metallocycle/ $\text{\AA}$ | N1–Ag1–N19 <sup>#</sup> / $^\circ$ |
|-------------------------------------------------------------------------|---------------------|---------------------------------------|-----------------------------------------------------------|------------------------------------------------------------------------------------------------------------------------------------------------|------------------------------------|
| [Ag <sub>2</sub> (bitmb)] <sub>2</sub> (SbF <sub>6</sub> ) <sub>2</sub> | Octahedral          | 89                                    | 8.07                                                      | 10.35/10.63                                                                                                                                    | 178.8(2)                           |
| [Ag <sub>2</sub> (bitmb)] <sub>2</sub> (PF <sub>6</sub> ) <sub>2</sub>  | Octahedral          | 71                                    | 7.83                                                      | 10.39/10.62                                                                                                                                    | 179.0(2)                           |
| [Ag <sub>2</sub> (bitmb)] <sub>2</sub> (BF <sub>4</sub> ) <sub>2</sub>  | Tetrahedral         | 54                                    | 7.17                                                      | 10.75/11.02                                                                                                                                    | 174.1(2)                           |
| [Ag <sub>2</sub> (bitmb)] <sub>2</sub> (NO <sub>3</sub> ) <sub>2</sub>  | Trigonal            | 40                                    | 6.68                                                      | 10.93/11.32                                                                                                                                    | 169.0(2)                           |

**Table S3** Unit cell parameters for **5**

| Compound reference | <b>5</b>  |
|--------------------|-----------|
| $a/\text{\AA}$     | 15.381(2) |
| $b/\text{\AA}$     | 11.818(1) |
| $c/\text{\AA}$     | 21.410(8) |
| $\alpha/^\circ$    | 90.0      |
| $\beta/^\circ$     | 107.53(2) |
| $\gamma/^\circ$    | 90.0      |



**Fig. S1** Overlay of metalocycle **1** (grey) with the corresponding one from **4c** (red); r.m.s. deviation of 0.1437 Å.
